# Supplementary material for: Sex-Dependent Role of Adipose Tissue HDAC9 in Diet-Induced Obesity and Metabolic Dysfunction
Source: MDPI journal article supplement (doi:10.3390/cells11172698), 2022-08-30
Supplement: s1 [file s1]

# Supplemental Figure S1

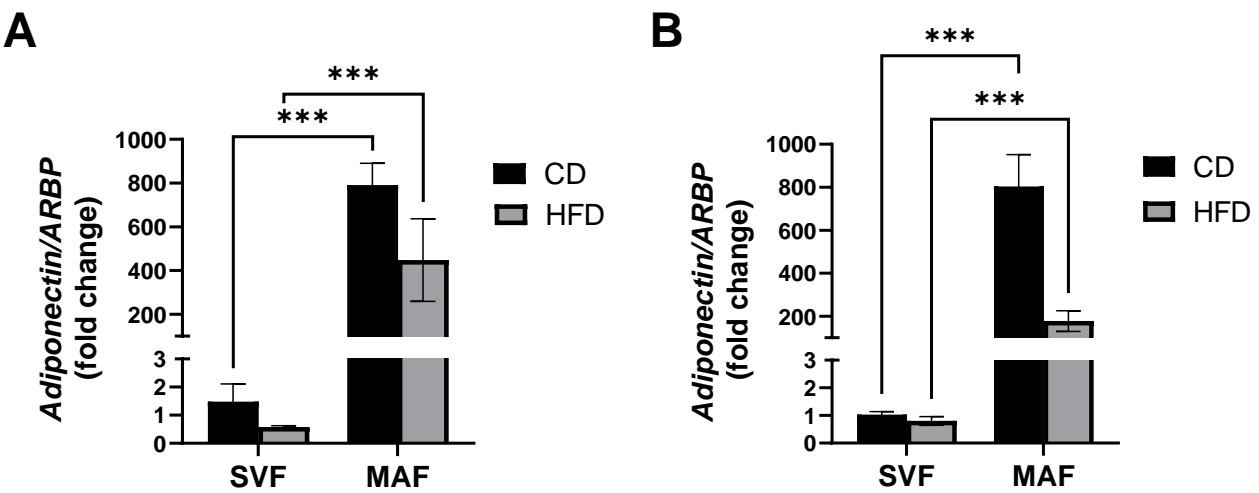

**Figure S1.** Validation of adipose fractionation. *Adiponectin* mRNA expression in SVF and MAF from SQ **(A)** and VF **(B)** of female WT mice either on CD or HFD (n=5-6). Data represent mean  $\pm$  SEM. \*\*\*p<0.001. SQ, subcutaneous adipose tissue; VF, visceral adipose tissue; CD, chow diet; HFD, high fat diet; SVF, stromovascular fraction; MAF, mature adipocyte fraction.

# Supplemental Figure S2

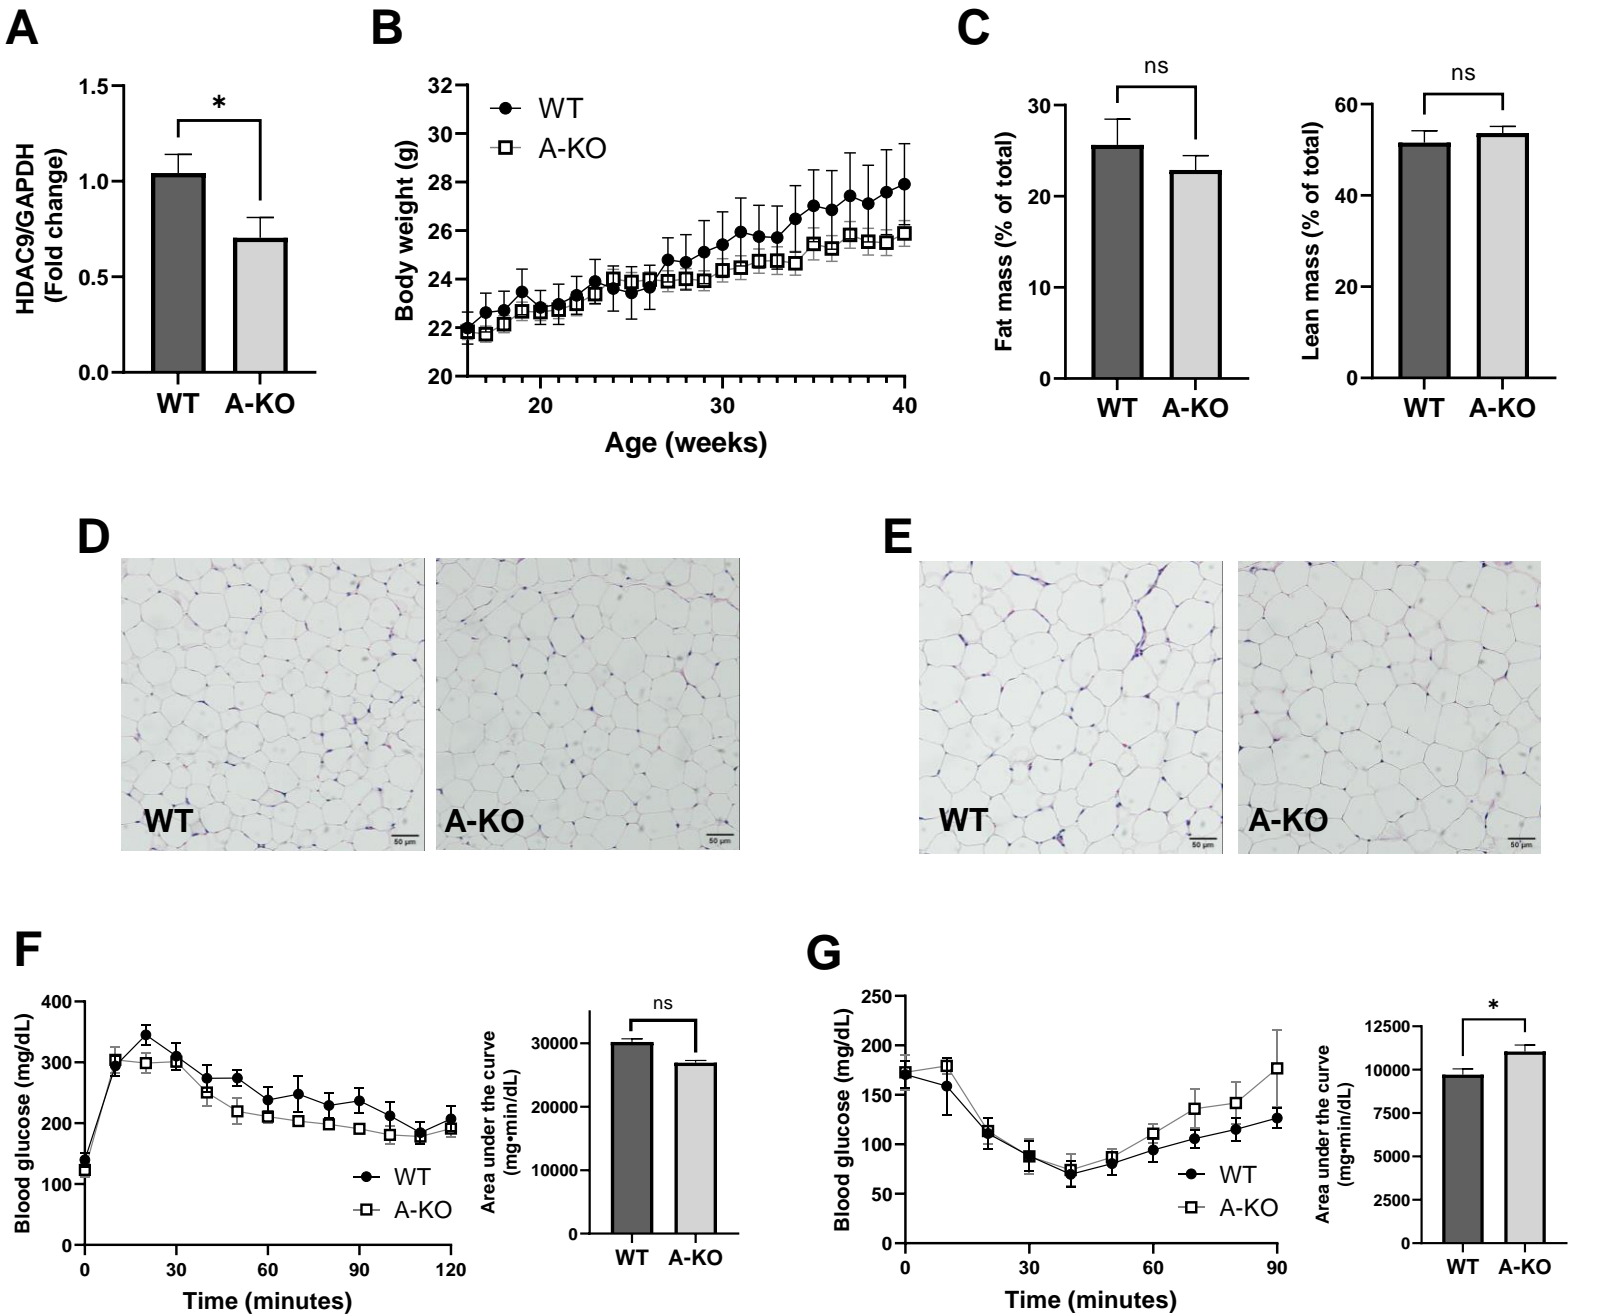

**Figure S2.** A-KO does not improve metabolic health in CD-fed female mice. **(A)** *HDAC9* mRNA expression level in SQ from CD-fed female mice (n=8-9). **(B)** Growth curves of CD-fed female WT and A-KO mice (n=8-9). **(C)** Fat mass and lean mass measured by whole body composition nuclear magnetic resonance (n=8-9). Representative H&E images of SQ **(D)** and VF **(E)** from CD-fed female WT and A-KO mice. Glucose tolerance **(F)** and insulin tolerance test **(G)** quantified by area under the curve (n=4). Data represent mean ± SEM. \*p<0.05. SQ, subcutaneous adipose tissue; VF, visceral adipose tissue.

# Supplemental Figure S3

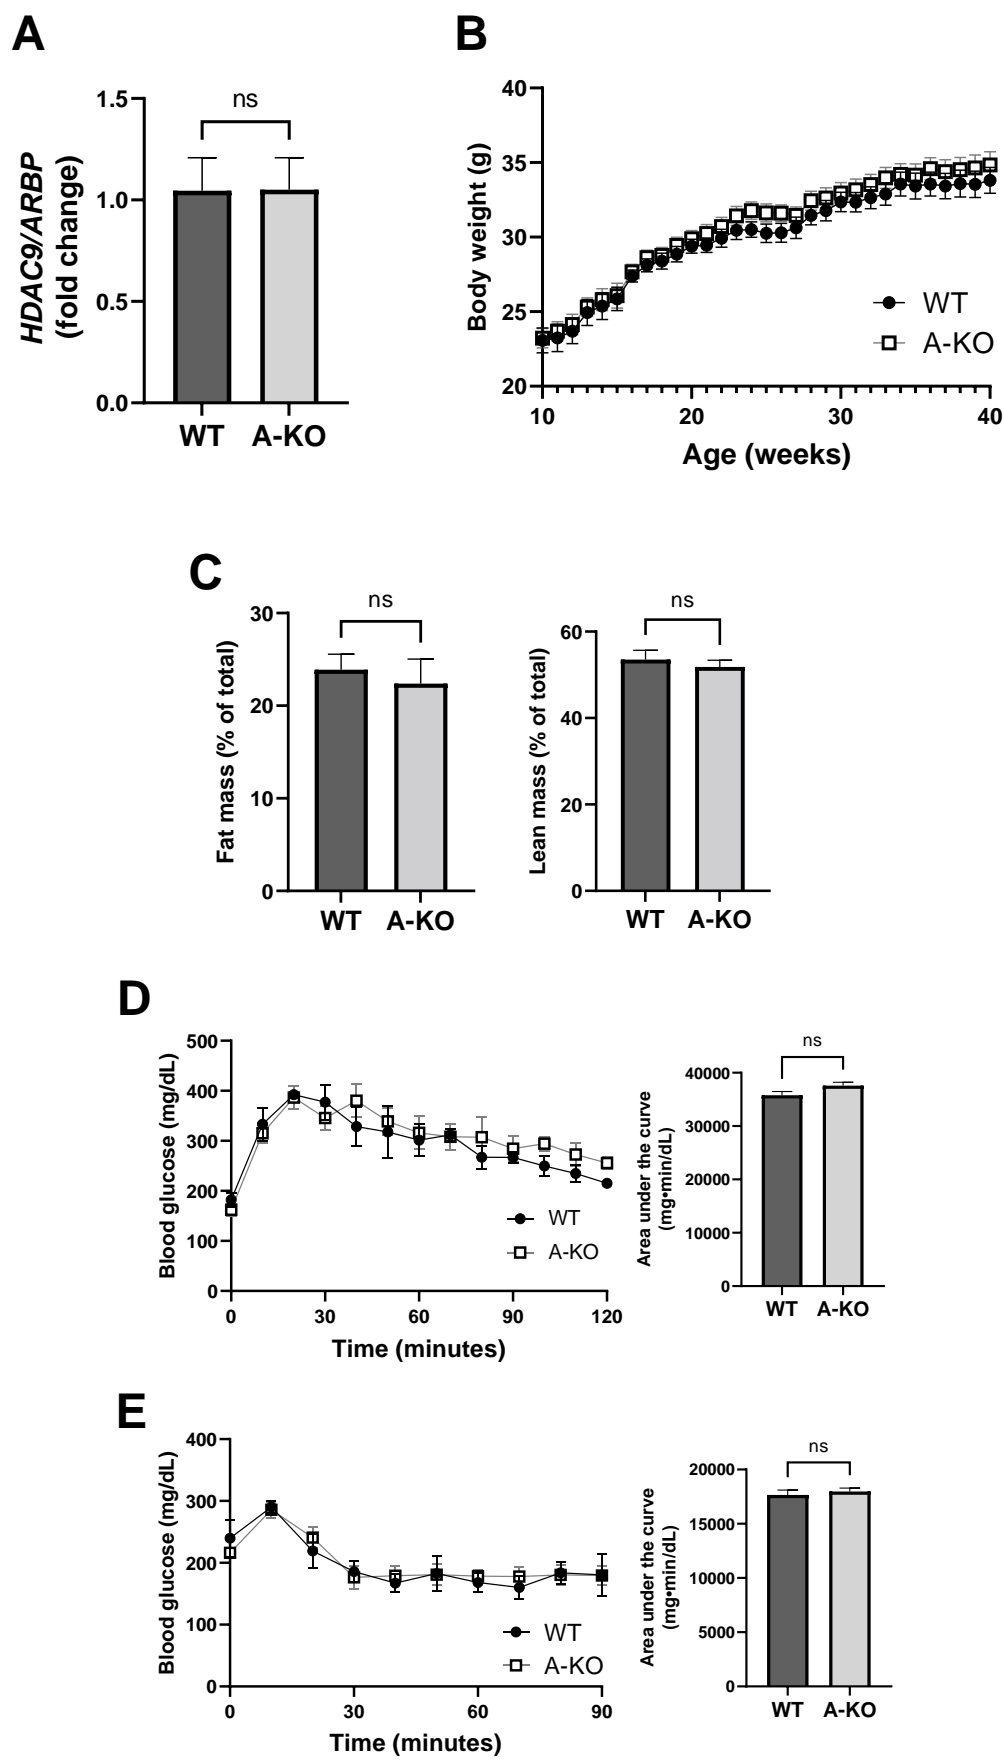

**Figure S3.** A-KO does not improve metabolic health in CD-fed male mice. **(A)** Expression of *HDAC9* mRNA in SQ CD-fed male mice determined by qPCR (n=3-4). **(B)** Growth curves of CD-fed male WT and A-KO mice (n=10-15). **(C)** Fat mass and lean mass measured by whole body composition nuclear magnetic resonance (n=7-10). Glucose tolerance **(D)** and insulin tolerance test **(E)** quantified by area under the curve (n=4). Data represent mean  $\pm$  SEM.

# Supplemental Figure S4

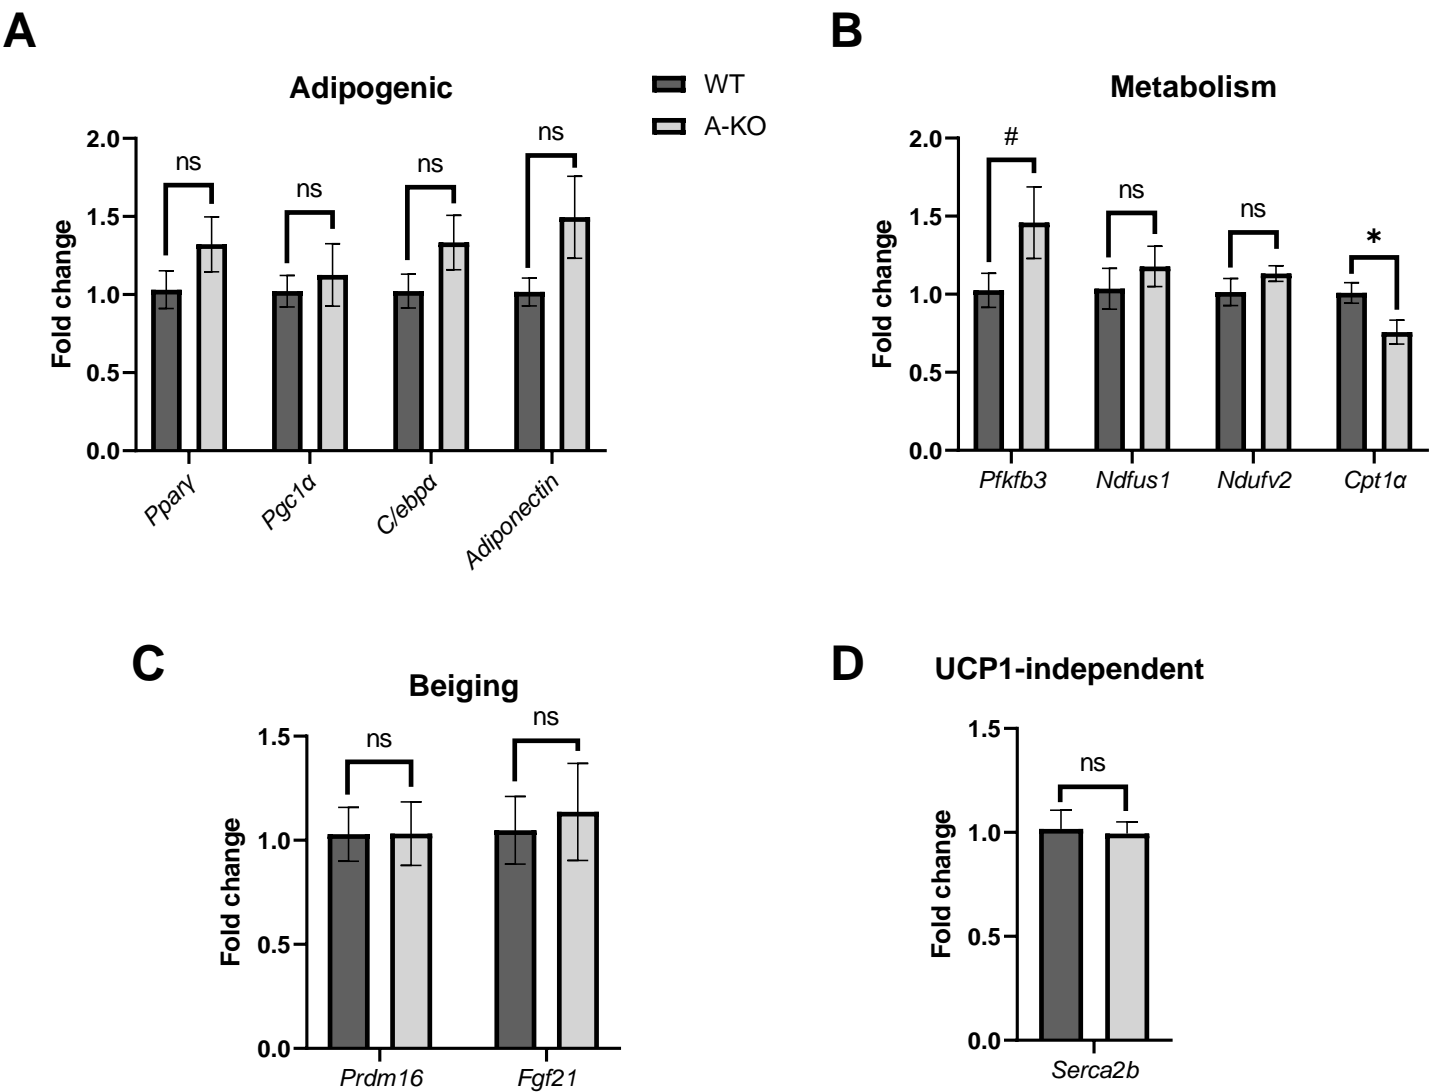

**Figure S4.** Adipocyte-specific *HDAC9* gene deletion does not significantly alter gene expression in VF from HFD-fed female mice. mRNA expression of **(A)** adipogenic, **(B)** metabolic genes **(C)** classic beiging and **(D)** UCP1-independent beiging genes in SQ from HFD-fed female mice (n=5-6). Data represent mean ± SEM. #p<0.1; \*p<0.05. VF, visceral adipose tissue; PPARγ, peroxisome proliferator-activated receptor gamma; Pgc1α, PPARγ coactivator 1-alpha; C/ebpa, CCAAT/enhancer-binding protein alpha; Pfkfb3, 6-phosphofructo-2-kinase/fructose-2,6-bisphosphatase 3; Ndfus1, NADH-ubiquinone oxidoreductase; Ndufv2, NADH-ubiquinone oxidoreductase flavoprotein 2; Cpt1a, carnitine palmitoyltransferase 1a; Prdm16, PR/SET domain 16; Fgf21, fibroblast growth factor 21; Serca2b, sarco/endoplasmic reticulum Ca<sup>2+</sup> ATPase 2b.

# Supplemental Table S1

**Table S1:** Demographic data of human subjects.

| BMI<br>(kg/m2) | Age (years) | Gender | Diabetes<br>Mellitus |
|----------------|-------------|--------|----------------------|
| 21.4           | 55          | M      | Yes                  |
| 23.3           | 50          | M      | No                   |
| 24.0           | 68          | M      | No                   |
| 24.0           | 43          | M      | Yes                  |
| 24.5           | 64          | M      | No                   |
| 25.0           | 62          | M      | No                   |
| 27.1           | 65          | M      | No                   |
| 27.8           | 60          | M      | No                   |
| 28.7           | 82          | M      | No                   |
| 34.9           | 53          | F      | No                   |
| 35.3           | 44          | M      | No                   |
| 42.2           | 64          | F      | Yes                  |

# Supplemental Table S2

**Table S2:** Primer Sequences.

| Gene Name          | Species | Forward                      | Reverse                     |
|--------------------|---------|------------------------------|-----------------------------|
| <i>Adiponectin</i> | mouse   | GCACTGGCAAGTTCTACTGCAACA     | AGAGAACGGCCTTGTCTTGTTGA     |
| <i>Arbp</i>        | mouse   | AGCTGAAGCAAAGGAAGAGTCGGA     | ACTTGGTTGCTTTGGCGGGATTAG    |
| <i>Aromatase</i>   | mouse   | GCTGAACCCCATGCAGTATAA        | AGCCAAAAGGCTGAAAGTACC       |
| <i>Atp5a1</i>      | mouse   | TCTCCATGCCTCTAACACTCG        | CCAGGTCAACAGACGTGTCAG       |
| <i>C/ebpa</i>      | mouse   | AGAAGTCGGTGGACAAGAACAGCA     | GCGTTGTTTGGCTTTATCTCGGCT    |
| <i>Cpt1α</i>       | mouse   | CATGATTGCAAAGATCAATCGG       | CTTGACATGCGGCCAGTG          |
| <i>Fabp4</i>       | mouse   | ATGAAATCACCGCAGACGACAGGA     | TGTGGTCGACTTTCCATCCCCTT     |
| <i>Fgf21</i>       | mouse   | CTCCACATGAGAGCTAGAACAC       | CTGATATCCAGGGCGAAGTAAG      |
| <i>Gatm</i>        | mouse   | CAGACACAAATTGGCCGCTC         | CCCAGGTAGTTTGTAACCTGGC      |
| <i>Hdac9</i>       | mouse   | AGGATGATGATGCCTGTGGTGGAT     | GAGTTGTGCTTGATGCTGCCTTGT    |
| <i>Ldha</i>        | mouse   | ACATTGTCAAGTACAGTCCACAC      | TTCCAATTACTCGGTTTTTGGGA     |
| <i>Leptin</i>      | mouse   | CAAGCAGTGCCTATCCAGA          | AAGCCCAGGAATGAAGTCCA        |
| <i>Ndfus1</i>      | mouse   | AACCACTGTTCTGCAGGCTT         | AGCGACAACCTTTGGAGCTT        |
| <i>Ndfuv2</i>      | mouse   | GCAAGGAATTTGCATAAGACAGC      | TAGCCATCCATTCTGCCTTTG       |
| <i>Pfkfb3</i>      | mouse   | TACGAAGCTCACACGCTATCT        | GCCTCTCGTCGATACTGACCTA      |
| <i>Pgc1α</i>       | mouse   | CCCTGCCATTGTTAAGACC          | TGCTGCTGTTCTGTTTTT          |
| <i>Pparγ</i>       | mouse   | ACATAAAGTCCTTCCCGCTGACCA     | AAATTCGGATGGCCACCTCTTTGC    |
| <i>Prdm16</i>      | mouse   | AGATGAACCAGGCATCCACTCGAA     | ACTTCCCGGCTAAGCTGTCATCAT    |
| <i>Ryr2</i>        | mouse   | ATGGCTTTAAGGCACAGCG          | ATGGCTTTAAGGCACAGCG         |
| <i>Serca2b</i>     | mouse   | ACCTTTGCCGCTCATTTTCCAG       | AGGCTGCACACACTCTTTACC       |
| <i>Tst</i>         | mouse   | CCTGCTGTAGGTTACCTTTTAGG      | GGAGGCACCAAGAGCAATTCTAAA    |
| <i>Ucp1</i>        | mouse   | AAGCTGTGCGATGTCCATGT         | AAGCCACAAACCCTTTGAAAA       |
| <i>Gapdh</i>       | human   | CGACTTCAACAGCAACTCCCACTCTTCC | TGGGTGGTCCAGGGTTTCTTACTCCTT |
| <i>Hdac9</i>       | human   | TACTCAGGCGGAAGGATGGA         | CCAGTTGGCCCATTGTTTGG        |
